# Supplementary material for: Deep sequencing and flow cytometric characterization of expanded effector memory CD8+CD57+ T cells frequently reveals T-cell receptor Vβ oligoclonality and CDR3 homology in acquired aplastic anemia
Source: PubMed Central journal article supplement — Haematologica. 2018 Feb 1;103(5):759–69. doi: 10.3324/haematol.2017.176701 (PMC5927970; doi:10.3324/haematol.2017.176701), 2018-05
Supplement: 2017.176701.GIUDICE_SUPPL.pdf [file 2017.176701.GIUDICE_SUPPL.pdf]

## Deep sequencing and flow cytometric characterization of expanded effector memory CD8<sup>+</sup>CD57<sup>+</sup> T cells frequently reveals T-cell receptor V $\beta$ oligoclonality and CDR3 homology in acquired aplastic anemia

Valentina Giudice,<sup>1</sup> Xingmin Feng,<sup>1</sup> Zenghua Lin,<sup>1,2</sup> Wei Hu,<sup>3</sup> Fanmao Zhang,<sup>3</sup> Wangmin Qiao,<sup>3</sup> Maria del Pilar Fernandez Ibanez,<sup>1</sup> Olga Rios,<sup>1</sup> and Neal S. Young<sup>1</sup>

<sup>1</sup>Hematology Branch, National Heart, Lung, and Blood Institute (NHLBI), NIH, Bethesda, MD, USA; <sup>2</sup>Department of Hematology, Affiliated Hospital of Nantong University, Jiangsu, China and <sup>3</sup>BGI Genomics, BGI-Shenzhen, China

©2018 Ferrata Storti Foundation. This is an open-access paper. doi:10.3324/haematol.2017.176701

Received: July 21, 2017.

Accepted: December 30, 2017.

Pre-published: February 1, 2018.

Correspondence: fengx2@nhlbi.nih.gov

---

## **Supplementary Methods**

### **Human samples**

Heparinized whole PB was collected from patients and healthy subjects after informed consent was obtained, in accordance with the Declaration of Helsinki<sup>31</sup> and protocols approved by the National Heart, Lung, and Blood Institute Institutional Review Board (National Institutes of Health, Bethesda, MD; Clinicaltrials.gov identifier: NCT00001620, NCT01623167, NCT00001397, NCT00071045, NCT00081523, NCT00961064) (*Online Supplementary Table S1* for clinical characteristics). HLA haplotypes were reported in *Online Supplementary Table S2*. All patients received a diagnosis of severe AA (SAA) according to the International Study of Aplastic Anemia and Agranulocytosis<sup>32</sup> and to the criteria of Camitta<sup>33</sup>. At the time of blood sampling, none of the patients had received therapy. Immunosuppressive therapies, such as cyclosporine A and anti-thymocyte globulin with or without eltrombopag, were administered according to protocols. Peripheral blood mononuclear cells (PBMCs) were isolated by Ficoll-Paque density gradient centrifugation (MP Biomedicals, LLC, Santa Ana, CA) according to the manufacturer's instructions.

### **Flow cytometric analysis**

A minimum of  $4 \times 10^6$  PBMCs from each subject were stained for TCR V $\beta$  repertoire analysis. Manufacturer's instructions of IOTest Beta Mark (Beckman Coulter, Miami, FL) were optimized as follows: 4  $\mu$ L of Pacific Blue – conjugated anti-CD8, 5  $\mu$ L of Brilliant Violet (BV) 510 – conjugated anti-CD28, 5  $\mu$ L of BV605 – conjugated anti-CD3, 5  $\mu$ L of allophycocyanin (APC) – conjugated anti-CD57, 5  $\mu$ L of APC-phycoerythrin cytochrome 7 (Cy7) – conjugated anti-CD4 antibodies (all from BioLegend, San Diego, CA) were added. Cell mixture was divided into 8

individual tubes with different TCR V $\beta$  antibody combinations (IOTest Beta Mark). After 20 min incubation at room temperature, samples were washed twice with phosphate buffered saline (PBS, Lonza, Walkersville, MD) and resuspended in the same buffer for acquisition. Expanded TCR V $\beta$  clones found in IOTest Beta Mark kit were confirmed for accuracy with individual TCR V $\beta$  antibodies (Beckman Coulter). Compensation was performed using single-color stained samples and an unstained sample as negative control. A LSR Fortessa cytometer equipped with FACSDiva software (v.8.0.1) (BD Biosciences, San Jose, CA) was used for acquisition, and FlowJo software (v.10.0.7b, Treestar, Ashland, OR) for analysis. Lymphocytes were identified based on forward and side scatter parameters and gated for CD3<sup>+</sup> expression. On CD3<sup>+</sup> population, CD4<sup>+</sup> and CD8<sup>+</sup> subsets were identified and gated for CD28 and CD57 expression. On CD28<sup>-</sup>CD57<sup>+</sup> and CD28<sup>+</sup>CD57<sup>-</sup> populations, each V $\beta$  subfamily was studied (*Online Supplementary Figure S1*). Percentages of CD28<sup>+</sup>CD57<sup>-</sup> and CD28<sup>-</sup>CD57<sup>+</sup> cells were expressed as percent of CD3<sup>+</sup>CD8<sup>+</sup> or CD3<sup>+</sup>CD4<sup>+</sup> cells; similarly, each V $\beta$  family size was expressed as percent of the given CD4<sup>+</sup> or CD8<sup>+</sup> cell population.

### **TCR repertoire deep sequencing**

Before alignment, raw reads were filtered to remove reads containing adaptor sequences, false positive, and low-quality reads. For merging two paired-reads into one complete sequence, COPE software v1.1.3 (BGI, Cambridge, MA) was used for an overlap of  $\geq 90\%$  base matching (10 to 99 nucleotides [nt] for overlapped region). For other reads, FqMerger software (BGI) was used for 90% identity (matched bases) with overlap length of 50 to 150 nt. The alignment was performed by MiTCR software (milaboratory) using -pset flex -cysphe 1 -t 6 as parameters and by The International Immunogenetics Information System® (IMGT) as database

(<http://www.imgt.org>). The number of in-frame reads during analysis was counted as productive reads. The sequence included between the second conserved cysteine encoded by the 3' region of V $\beta$  gene segment and the conserved phenylalanine encoded by the 5' portion of J $\beta$  gene segment was considered as CDR3  $\beta$  sequence<sup>17</sup>.

### **Homology assessment**

CDR3 amino acid sequences with frequency > 0.1% in CD8<sup>+</sup> cell pool were selected for homology analysis (Figure 6A) as previously described<sup>17,40</sup> to assess identical CDR3 sequences among filtered TCR repertoires.

Finally, immunodominant and shared CDR3 sequences were compared with CDR3  $\beta$  repertoires reported in literature for cytomegalovirus<sup>1-9</sup>, Epstein-Barr virus<sup>3,6,9</sup>, BK virus<sup>8</sup>, herpes-simplex virus type 1 and 2<sup>10-12</sup>, varicella-Zoster virus<sup>13</sup>, hepatitis C virus<sup>14</sup>, and *Mycobacterium tuberculosis*<sup>15-16</sup> infections. Sequences from the following diseases were also analyzed: non-Hodgkin lymphomas<sup>17</sup>, T-large granular lymphocyte leukemia (T-LGLL)<sup>18</sup>, AA<sup>19</sup>, paroxysmal nocturnal hemoglobinuria<sup>20</sup>, juvenile dermatomyositis syndrome<sup>21</sup>, multiple sclerosis<sup>22</sup>, rheumatoid arthritis<sup>23</sup>, systemic lupus erythematosus<sup>24</sup>, cancers<sup>25-30</sup>, Crohn's disease<sup>31</sup>, and also from human mucosal-associated invariant T cell TCR repertoire<sup>32</sup>.

Structural analysis of shared and immunodominant clonotypes was performed to identify similar charged residue pattern within CDR3 sequences, as described previously<sup>8</sup>. Amino acid sequences, as defined above, were aligned at N-terminal of V $\beta$  and C-terminal of J $\beta$ . ClustalW2 (<https://www.ebi.ac.uk/Tools/msa/clustalw2/>) was used to confirm our analysis.

## Supplementary references

1. Suessmuth Y, Mukherjee R, Watkins B, et al. CMV reactivation drives post transplant T-cell reconstitution and results in defects in the underlying TCR $\beta$  repertoire. *Blood*. 2015;125(25):3835-3850.
2. Giest S, McWhinnie A, Lefranc MP, et al. Cytomegalovirus-specific CD8<sup>+</sup> T cells targeting different peptide/HLA combinations demonstrate varying T-cell receptor diversity. *Immunology*. 2012;135(1):27-39.
3. Klarenbeek PL, Remmerswaal EB, ten Berge IJ, et al. Deep sequencing of antiviral T-cell responses to HCMV and EBV in humans reveals a stable repertoire that is maintained for many years. *PLoS Pathog*. 2012;8(9):e1002889.
4. Trautmann L, Rimbart M, Echasserieu K, et al. Selection of T cell clones expressing high-affinity public TCRs within Human cytomegalovirus-specific CD8 T cell responses. *J Immunol*. 2005;175(9):6123-6132.
5. Ruggiero E, Nicolay JP, Fronza R, et al. High-resolution analysis of the human T-cell receptor repertoire. *Nat Commun*. 2015;6:8081.
6. Venturi V, Chin HY, Asher TE, et al. TCR beta-chain sharing in human CD8<sup>+</sup> T cell responses to cytomegalovirus and EBV. *J Immunol*. 2008;181(11):7853-7862.
7. Miconnet I, Marrau A, Farina A, et al. Large TCR diversity of virus-specific CD8 T cells provides the mechanistic basis for massive TCR renewal after antigen exposure. *J Immunol*. 2011;186(12):7039-7049.
8. Dziubianau M, Hecht J, Kuchenbecker L, et al. TCR repertoire analysis by next generation sequencing allows complex differential diagnosis of T cell-related pathology. *Am J Transplant*. 2013;13(11):2842-2854.

9. Lim A, Trautmann L, Peyrat MA, et al. Frequent contribution of T cell clonotypes with public TCR features to the chronic response against a dominant EBV-derived epitope: application to direct detection of their molecular imprint on the human peripheral T cell repertoire. *J Immunol.* 2000;165(4):2001-2011.
10. Held K, Eiglmeier I, Himmelein S, et al. Clonal expansions of CD8<sup>+</sup> T cells in latently HSV-1-infected human trigeminal ganglia. *J Neurovirol.* 2012;18(1):62-68.
11. Jing L, Laing KJ, Dong L, Russell RM, et al. Extensive CD4 and CD8 T Cell Cross-Reactivity between Alpha herpes viruses. *J Immunol.* 2016;196(5):2205-2218.
12. Dong L, Li P, Oenema T, McClurkan CL, Koelle DM. Public TCR use by herpes simplex virus-2-specific human CD8 CTLs. *J Immunol.* 2010;184(6):3063-3071.
13. D'Orsogna LJ, van Besouw NM, van der Meer-Prins EM, et al. Vaccine-induced allo-HLA-reactive memory T cells in a kidney transplantation candidate. *Transplantation.* 2011;91(6):645-651.
14. Meyer-Olson D, Shoukry NH, Brady KW, et al. Limited T cell receptor diversity of HCV-specific T cell responses is associated with CTL escape. *J Exp Med.* 2004;200(3):307-319.
15. Li D, Gao G, Li Z, et al. Profiling the T-cell receptor repertoire of patient with pleural tuberculosis by high-throughput sequencing. *Immunol Lett.* 2014;162(1 Pt A):170-180.
16. Luo W, Su J, Zhang XB, et al. Limited T cell receptor repertoire diversity in tuberculosis patients correlates with clinical severity. *PLoS One.* 2012;7(10):e48117.
17. Yin Q, Tan H, Chen S, Yang L, Ye J, Li Y. Characterization of conserved CDR3 sequence of TCR alpha- and beta-chain genes in peripheral blood T-cells from patients with diffuse large B-cell lymphoma. *Hematology.* 2010;15(1):48-57.

18. O'Keefe CL, Plasilova M, Wlodarski M, et al. Molecular analysis of TCR clonotypes in LGL: a clonal model for polyclonal responses. *J Immunol.* 2004;172(3):1960-1969.
19. Zeng W, Maciejewski JP, Chen G, Young NS. Limited heterogeneity of T cell receptor BV usage in aplastic anemia. *J Clin Invest.* 2001;108(5):765-773.
20. Gargiulo L, Lastraioli S, Cerruti G, et al. Highly homologous T-cell receptor beta sequences support a common target for autoreactive T cells in most patients with paroxysmal nocturnal hemoglobinuria. *Blood.* 2007;109(11):5036-5042.
21. Mizuno K, Yachie A, Nagaoki S, et al. Oligoclonal expansion of circulating and tissue-infiltrating CD8+ T cells with killer/effector phenotypes in juvenile dermatomyositis syndrome. *Clin Exp Immunol.* 2004;137(1):187-194.
22. Hong J, Zang YC, Tejada-Simon MV, et al. A common TCR V-D-J sequence in V beta 13.1 T cells recognizing an immunodominant peptide of myelin basic protein in multiple sclerosis. *J Immunol.* 1999;163(6):3530-3538.
23. Sun W, Nie H, Li N, et al. Skewed T-cell receptor BV14 and BV16 expression and shared CDR3 sequence and common sequence motifs in synovial T cells of rheumatoid arthritis. *Genes Immun.* 2005;6(3):248-261.
24. Sui W, Hou X, Zou G, et al. Composition and variation analysis of the TCR  $\beta$ -chain CDR3 repertoire in systemic lupus erythematosus using high-throughput sequencing. *Mol Immunol.* 2015;67(2 Pt B):455-464.
25. Vignard V, Lemercier B, Lim A, et al. Adoptive transfer of tumor-reactive Melan-A-specific CTL clones in melanoma patients is followed by increased frequencies of additional Melan-A-specific T cells. *J Immunol.* 2005;175(7):4797-4805.

26. Derré L, Bruyninx M, Baumgaertner P, et al. Distinct sets of alphabeta TCRs confer similar recognition of tumor antigen NY-ESO-1157-165 by interacting with its central Met/Trp residues. *Proc Natl Acad Sci U S A*. 2008;105(39):15010-15015.
27. Le Gal FA, Ayyoub M, Dutoit V, et al. Distinct structural TCR repertoires in naturally occurring versus vaccine-induced CD8<sup>+</sup> T-cell responses to the tumor-specific antigen NY-ESO-1. *J Immunother*. 2005;28(3):252-257.
28. Serana F, Sottini A, Caimi L, et al. Identification of a public CDR3 motif and a biased utilization of T-cell receptor V beta and J beta chains in HLA-A2/Melan-A-specific T-cell clonotypes of melanoma patients. *J Transl Med*. 2009;7:21.
29. Wieckowski S, Baumgaertner P, Corthesy P, et al. Fine structural variations of alphabetaTCRs selected by vaccination with natural versus altered self-antigen in melanoma patients. *J Immunol*. 2009;183(8):5397-5406.
30. Dietrich PY, Le Gal FA, Dutoit V, et al. Prevalent role of TCR alpha-chain in the selection of the preimmune repertoire specific for a human tumor-associated self-antigen. *J Immunol*. 2003;170(10):5103-5109.
31. Chapman CG, Yamaguchi R, Tamura K, et al. Characterization of T-cell Receptor Repertoire in Inflamed Tissues of Patients with Crohn's Disease Through Deep Sequencing. *Inflamm Bowel Dis*. 2016;22(6):1275-1285.
32. Lepore M, Kalinichenko A, Colone A, et al. Parallel T-cell cloning and deep sequencing of human MAIT cells reveal stable oligoclonal TCR $\beta$  repertoire. *Nat Commun*. 2014;5:3866.



## **Supplementary Tables**

**Supplementary Table S1. Characteristics of patients and healthy donors.**

**Supplementary Table S2. SAA patients' (n=12) and healthy donors' (n=9) characteristics of TCR repertoire deep sequencing in CD8<sup>+</sup> T cells.**

**Supplementary Table S3. Frequency of PNH-related clonotypes.**

**Supplementary Table S1. Clinical characteristics.**

|                           | SAA<br>(n=24)             | PRCA<br>(n=5)          | MDS<br>(n=8)           | SCD<br>(n=10)          | Healthy controls<br>(n=34) |
|---------------------------|---------------------------|------------------------|------------------------|------------------------|----------------------------|
| Mean age (years)          | 38.7<br>(range, 7-79)     | 60.8<br>(range, 29-82) | 60.4<br>(range, 38-79) | 46.9<br>(range, 34-66) | 41<br>(range 23-82)        |
| Gender (M/F)              | 13/11                     | 1/4                    | 5/3                    | 4/6                    | 15/19                      |
| Transfusion history       | 23                        | 5                      | 6                      | 10                     | -                          |
| No transfusion records    | 1                         | -                      | 2                      | -                      |                            |
| CMV serostatus            |                           |                        |                        |                        |                            |
| IgG positivity            | 15/24                     |                        |                        |                        |                            |
| IgM positivity            | 1/24                      |                        |                        |                        |                            |
| Median follow-up (months) | 14.1<br>(range, 2.9-55.3) | -                      | -                      | -                      | -                          |
| Relapse/Death             | 7                         | -                      | -                      | -                      | -                          |
| Treatment                 |                           | -                      | -                      | -                      | -                          |
| None                      | 1                         |                        |                        |                        |                            |
| CsA+ATG                   | 3                         |                        |                        |                        |                            |
| CsA+ATG+Eltrombopag       | 20                        |                        |                        |                        |                            |

SAA: severe acquired aplastic anemia; PRCA: pure red cell aplasia; MDS: myelodysplastic syndrome; SCD: sickle cell disease; CMV: cytomegalovirus; CsA: cyclosporine A; ATG: anti-thymocyte globulin.

**Supplementary Table S2. SAA patients' (n=12) and healthy donors' (n=9) characteristics of TCR repertoire deep sequencing in CD8<sup>+</sup> T cells.**

| CMV serostatus             |     |     |            |             | HLA characterization |       |       |       |       |       |      | Deep sequencing |          |               |                      |                  |       |
|----------------------------|-----|-----|------------|-------------|----------------------|-------|-------|-------|-------|-------|------|-----------------|----------|---------------|----------------------|------------------|-------|
|                            | Age | M/F | IgG (U/mL) | IgM (AU/mL) | A                    | A*02  | B     | C     | DRB1  | DQB1  | DRB_ | V gene          | J gene   | NGS frequency | Amino acid sequence  | NGS frequency    |       |
| <b>SAA patients (n=12)</b> |     |     |            |             |                      |       |       |       |       |       |      |                 |          |               |                      |                  |       |
| AA1                        | 44  | F   | 2.43       | Neg.        | 02,30                | 01:01 | 14,44 | 05,08 | 01,04 | 03,05 | 4*01 | TRBV2           | TRBJ2-7  | 0.231         | CASSVRDYEQYF         | 0.215            |       |
|                            |     |     |            |             |                      |       |       |       |       |       |      | TRBV20-1        | TRBJ2-3  | 0.042         | CSALPPGLASTDTQYF     | 0.022            |       |
|                            |     |     |            |             |                      |       |       |       |       |       |      | TRBV4-2         | TRBJ1-2  | 0.041         | CASSQEVGGTNYGYTF     | 0.040            |       |
| AA2                        | 71  | M   | 2.52       | Neg.        | 25,74                |       | 07,18 | 07,12 | 07,15 | 02,06 | 4*01 | TRBV15          | TRBJ2-5  | 0.349         | CATSTGTWTEQETQYF     | 0.346            |       |
|                            |     |     |            |             |                      |       |       |       |       |       | 5*01 | TRBV7-9         | TRBJ2-7  | 0.139         | CASSFRDWGRYEQYF      | 0.128            |       |
|                            |     |     |            |             |                      |       |       |       |       |       |      | TRBV20-1        | TRBJ2-7  | 0.097         | CSARDLAEQYF          | 0.093            |       |
| AA3                        | 59  | F   | Neg.       | Neg.        | 01,02                | 01    | 07,18 | 07,07 | 04,11 | 03,03 | 3*02 | TRBV20-1        | TRBJ2-3  | 0.541         | CSARDPPVSGTRGTDQYF   | 0.536            |       |
|                            |     |     |            |             |                      | 246   |       |       |       |       | 4*01 | TRBV6-6         | TRBJ2-1  | 0.024         | CASSYRETNEQFF        | 0.023            |       |
|                            |     |     |            |             |                      | 338   |       |       |       |       |      | TRBV15          | TRBJ2-7  | 0.021         | CATSRETGAAEQYF       | 0.018            |       |
| AA4                        | 44  | M   | >5.0       | Neg.        | 02,74                | 01:01 | 35,57 | 07,16 | 08,13 | 02,03 | 3*02 | TRBV15          | TRBJ2-1  | 0.240         | CATSSSRSGQLNEQFF     | 0.234            |       |
|                            |     |     |            |             |                      | 90    |       |       |       |       |      | TRBV15          | TRBJ1-1  | 0.147         | CATSRPFPQGQGAN*AEAFF | 0.142            |       |
|                            |     |     |            |             |                      | 195   |       |       |       |       |      | TRBV24-1        | TRBJ2-7  | 0.054         | CATSDPLTASYEQYF      | 0.049            |       |
| AA5                        | 55  | M   | >5.0       | Neg.        | 33,36                | .     | 45,58 | 03,16 | 03,12 | 02,03 | 3*02 | TRBV9           | TRBJ2-2  | 0.162         | CASGGANSPLHF         | 0.119            |       |
|                            |     |     |            |             |                      |       |       |       |       |       |      | TRBV20-1        | TRBJ2-6  | 0.050         | CSAPDDGANVLTF        | 0.047            |       |
|                            |     |     |            |             |                      |       |       |       |       |       |      | TRBV29-1        | TRBJ2-7  | 0.027         | CSVEADNRAGANVLTF     | 0.000            |       |
| AA6                        | 30  | M   | 2.53       | Neg.        | 02,33                | 02    | 40,53 | 03,04 | 04,15 | 03,06 | 4*01 | TRBV5-6         | TRBJ2-1  | 0.176         | CASSLD~SNEQFF        | 0.176            |       |
|                            |     |     |            |             |                      |       |       |       |       |       |      | 5*01:01         | TRBV6-4  | TRBJ2-5       | 0.118                | CASSEGLESETQYF   | 0.113 |
|                            |     |     |            |             |                      |       |       |       |       |       |      | TRBV20-1        | TRBJ2-1  | 0.111         | CSAPGSGDRNEQFF       | 0.103            |       |
| AA7                        | 49  | M   | Neg.       | Neg.        | 01,26                |       | 07,27 | 06,07 | 11,15 | 03,06 | 3*02 | TRBV12-4, 12-3  | TRBJ2-2  | 0.043         | CASSFTGELFF          | 0.041            |       |
|                            |     |     |            |             |                      |       |       |       |       |       |      | 5*01:01         | TRBV15   | TRBJ1-1       | 0.039                | CATGSTRTGGRTAEFF | 0.036 |
|                            |     |     |            |             |                      |       |       |       |       |       |      | TRBV5-6         | TRBJ1-2  | 0.035         | CASSLAGNYGYTF        | 0.030            |       |
| AA8                        | 40  | F   | Neg.       | Neg.        | 03,24                |       | 07,49 | 07,07 | 11,15 | 03,06 | 3*02 | TRBV20-1        | TRBJ2-7  | 0.034         | CSARDAADYEQYF        | 0.008            |       |
|                            |     |     |            |             |                      |       |       |       |       |       |      | 5*01:01         | TRBV20-1 | TRBJ1-1       | 0.030                | CSASRAGGVTEAFF   | 0.009 |
|                            |     |     |            |             |                      |       |       |       |       |       |      | TRBV20-1        | TRBJ2-6  | 0.027         | CSARDAP~GANVLTF      | 0.015            |       |
| AA9                        | 55  | F   | > 10       | Neg         | 11,26                |       | 51,52 | 07,12 | 04,10 | 03,05 | 4*01 | TRBV20-1        | TRBJ1-5  | 0.193         | CSATDG~NQPHF         | 0.189            |       |
|                            |     |     |            |             |                      |       |       |       |       |       |      | TRBV15          | TRBJ2-5  | 0.221         | CATSRVAGETQYF        | 0.188            |       |
|                            |     |     |            |             |                      |       |       |       |       |       |      | TRBV7-8         | TRBJ2-7  | 0.075         | CASSSPGQFDEQYF       | 0.072            |       |
| AA10                       | 57  | F   | > 10       | Neg         | 11,29                |       | 07,14 | 08,15 | 11,15 | 03,06 | 3*02 | TRBV7-8         | TRBJ2-3  | 0.117         | CASSLAGGPDQYF        | 0.116            |       |
|                            |     |     |            |             |                      |       |       |       |       |       |      | 5*01            | TRBV2    | TRBJ2-3       | 0.086                | CASGDGGTDTQYF    | 0.083 |

|                               |    |   |     |     |       |  |       |       |       |       |         |                |         |        |                      |       |
|-------------------------------|----|---|-----|-----|-------|--|-------|-------|-------|-------|---------|----------------|---------|--------|----------------------|-------|
|                               |    |   |     |     |       |  |       |       |       |       |         | TRBV11-3       | TRBJ1-1 | 0.043  | CASSDLTGNTEAFF       | 0.042 |
| AA11                          | 16 | M | 7.2 | Neg | 02,30 |  | 07,57 | 07,18 | 11,15 | 03,06 | 3*02    | TRBV10-3       | TRBJ2-5 | 0.033  | CAISSERTSSQETQYF     | 0.028 |
|                               |    |   |     |     |       |  |       |       |       |       | 5*01:01 | TRBV10-2       | TRBJ1-2 | 0.026  | CASSESRGYNYGYTF      | 0.024 |
|                               |    |   |     |     |       |  |       |       |       |       |         | TRBV4-3        | TRBJ1-6 | 0.019  | CASSQDLLPGDNSPLHF    | 0.018 |
| AA12                          | 14 | M | 2.6 | Neg | 24    |  | 07,52 | 03,07 | 14,15 | 03,06 | 3*01    | TRBV5-1        | TRBJ1-2 | 0.064  | CASSQR~GGYTF         | 0.061 |
|                               |    |   |     |     |       |  |       |       |       |       | 5*01:01 | TRBV10-1       | TRBJ2-7 | 0.022  | CASSDGGPSYEQYF       | 0.020 |
|                               |    |   |     |     |       |  |       |       |       |       |         | TRBV3-1        | TRBJ2-7 | 0.011  | CASSPRQGVDEQYF       | 0.010 |
| <b>Healthy controls (n=9)</b> |    |   |     |     |       |  |       |       |       |       |         |                |         |        |                      |       |
| HC1                           | 35 | M |     |     |       |  |       |       |       |       |         | TRBV15         | TRBJ2-1 | 0.107  | CATSRDGDGLGYNEQFF    | 0.101 |
|                               |    |   |     |     |       |  |       |       |       |       |         | TRBV5-6        | TRBJ2-7 | 0.094  | CASSLDPGSYEQYF       | 0.091 |
|                               |    |   |     |     |       |  |       |       |       |       |         | TRBV24-1       | TRBJ1-5 | 0.069  | CATSLAG~DQPQHF       | 0.065 |
| HC2                           | 36 | M |     |     |       |  |       |       |       |       |         | TRBV12-4, 12-3 | TRBJ1-2 | 0.092  | CASSSANYGYTF         | 0.088 |
|                               |    |   |     |     |       |  |       |       |       |       |         | TRBV20-1       | TRBJ2-7 | 0.059  | CSAPGGGGQGNPEQYF     | 0.016 |
|                               |    |   |     |     |       |  |       |       |       |       |         | TRBV4-1        | TRBJ1-1 | 0.056  | CASSQEQT DANTEAFF    | 0.055 |
| HC3                           |    |   |     |     |       |  |       |       |       |       |         | TRBV7-9        | TRBJ2-2 | 0.121  | CASSLDSPFFGELFF      | 0.119 |
|                               |    |   |     |     |       |  |       |       |       |       |         | TRBV29-1       | TRBJ2-7 | 0.091  | CSVEGGSSYEQYF        | 0.045 |
|                               |    |   |     |     |       |  |       |       |       |       |         | TRBV6-1        | TRBJ2-7 | 0.068  | CASMDWQQDRAYEQYF     | 0.066 |
| HC4                           | 38 | F |     |     |       |  |       |       |       |       |         | TRBV10-3       | TRBJ1-6 | 0.051  | CAISELWARVPVGN SPLHF | 0.049 |
|                               |    |   |     |     |       |  |       |       |       |       |         | TRBV10-2       | TRBJ2-5 | 0.041  | CASQGTGEKTQYF        | 0.041 |
|                               |    |   |     |     |       |  |       |       |       |       |         | TRBV10-1       | TRBJ1-1 | 0.016  | CASSERKG~GGSTE AFF   | 0.016 |
| HC5                           | 27 | F |     |     |       |  |       |       |       |       |         | TRBV25-1       | TRBJ2-7 | 0.150  | CASSGGGRGIKNEQYF     | 0.132 |
|                               |    |   |     |     |       |  |       |       |       |       |         | TRBV5-1        | TRBJ2-3 | 0.072  | CASSLEGGYTDQYF       | 0.066 |
|                               |    |   |     |     |       |  |       |       |       |       |         | TRBV20-1       | TRBJ2-7 | 0.037  | CSAIPGTGYEQYF        | 0.019 |
| HC6                           | 28 | F |     |     |       |  |       |       |       |       |         | TRBV25-1       | TRBJ2-3 | 0.383  | CASSALAGAGDTQYF      | 0.379 |
|                               |    |   |     |     |       |  |       |       |       |       |         | TRBV10-1       | TRBJ2-2 | 0.191  | CASTID~GELFF         | 0.190 |
|                               |    |   |     |     |       |  |       |       |       |       |         | TRBV6-4        | TRBJ1-6 | 0.036  | CASSDSSGGNSPLHF      | 0.036 |
| HC7                           | 23 | M |     |     |       |  |       |       |       |       |         | TRBV7-9        | TRBJ2-1 | 0.089  | CASSLAERLSSYNEQFF    | 0.084 |
|                               |    |   |     |     |       |  |       |       |       |       |         | TRBV19         | TRBJ2-5 | 0.072  | CASSTWDRGSRETQYF     | 0.052 |
|                               |    |   |     |     |       |  |       |       |       |       |         | TRBV29-1       | TRBJ1-2 | 0.043  | CSAVRQGEYGYTF        | 0.041 |
| HC8                           | 24 | F |     |     |       |  |       |       |       |       |         | TRBV19         | TRBJ1-1 | 0.032  | CASSIVGRGDTEAFF      | 0.020 |
|                               |    |   |     |     |       |  |       |       |       |       |         | TRBV20-1       | TRBJ2-5 | 0.030  | CSASGASGELRETQYF     | 0.018 |
|                               |    |   |     |     |       |  |       |       |       |       |         | TRBV29-1       | TRBJ2-5 | 0.017  | CSVEVSWTGG*ETQYF     | 0.013 |
| HC9                           | 32 | F |     |     |       |  |       |       |       |       |         | TRBV7-6        | TRBJ2-5 | 0.533  | CASSLGETQYF          | 0.056 |
|                               |    |   |     |     |       |  |       |       |       |       |         | TRBV20-1       | TRBJ2-1 | 0.0003 | CSSGPYNEQFF          | 0.027 |
|                               |    |   |     |     |       |  |       |       |       |       |         | TRBV7-7        | TRBJ2-7 | 0.0002 | CASSLAPGSTYEQYF      | 0.026 |

SAA: severe acquired aplastic anemia; TCR: T-cell receptor; CMV: cytomegalovirus; HLA: human leukocyte antigen; NGS: next-generation sequencing.

**Supplementary Table S3. Frequency of PNH-associated clonotypes.**

|                 | CASSLVGGPEQYF | CATSRVAGETQYF | CATSRTAGETQYF | CATSRTGGETQYF | CATSRVGGETQYF | CATSRDLAGETQYF |
|-----------------|---------------|---------------|---------------|---------------|---------------|----------------|
| <b>AA1</b>      |               |               |               | 0.0001        |               |                |
| <b>AA2</b>      |               |               |               | 0.0456        |               |                |
| <b>AA3</b>      | 0.00002       |               |               | 0.0001        |               |                |
| <b>AA4</b>      | 0.00001       |               |               | 0.0003        |               |                |
| <b>AA5</b>      |               |               |               |               |               |                |
| <b>AA6</b>      |               |               |               | 0.0003        |               |                |
| <b>AA7</b>      |               |               |               | 0.0002        |               |                |
| <b>AA8</b>      | 0.00003       |               |               | 0.0002        |               |                |
| <b>AA9</b>      |               | 18.8384       | 0.00003       | 0.6668        | 9.7E-05       | 1.4E-05        |
| <b>AA10</b>     |               | 0.0105        |               | 0.0004        |               |                |
| <b>AA11</b>     |               | 0.0115        |               | 0.0003        |               |                |
| <b>AA12</b>     |               | 0.0170        |               | 0.0006        |               |                |
| <b>AA3 CD57</b> |               |               |               |               |               |                |
| <b>AA4 CD57</b> |               |               |               |               |               |                |
| <b>HC1</b>      | 0.00002       |               |               | 0.0002        |               |                |
| <b>HC2</b>      | 0.00001       |               |               | 0.0002        |               |                |
| <b>HC3</b>      |               |               |               | 0.0002        |               |                |
| <b>HC4</b>      |               | 0.0090        |               | 0.0003        |               |                |
| <b>HC5</b>      |               | 0.0127        |               | 0.0005        |               |                |
| <b>HC6</b>      |               | 0.0083        |               | 0.0003        |               | 2.2E-03        |
| <b>HC7</b>      |               | 0.0104        |               | 0.0004        |               |                |
| <b>HC8</b>      |               | 0.0102        |               | 0.0003        |               |                |
| <b>HC9</b>      |               |               |               |               |               |                |

PNH: paroxysmal nocturnal hemoglobinuria; AA: acquired aplastic anemia patient identification number; HC: healthy control identification number. PNH-related CDR3 sequences are from *Gargiulo L, et al. Blood. 2007;109(11):5036-5042.*

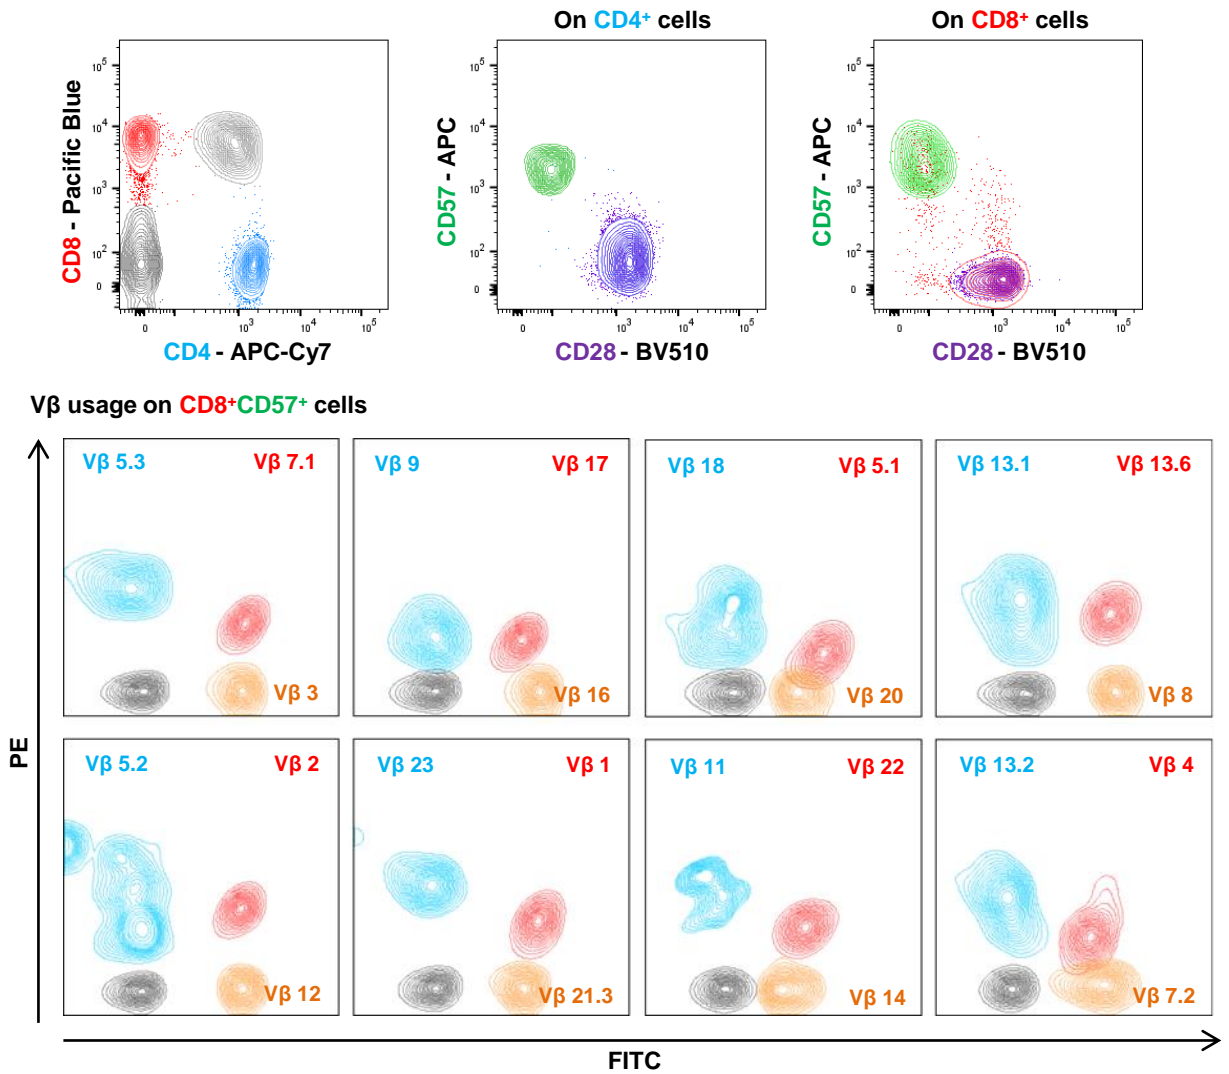

**Supplementary Figure S1. Vβ usage in CD4+ and CD8+ subsets.**

CD28+ and CD57+ subsets were gated on CD4+ and CD8+ T cells respectively (top panels) and, on each population, Vβ usage was studied (bottom panels) using a double immunofluorescence (FITC/PE) staining with 8 different Vβ mAbs mixtures in combination with CD3 - BV605, CD4 - APC-Cy7, CD8 - Pacific Blue, CD28 - BV510, and CD57 - APC.

**A** CD4<sup>+</sup>CD28<sup>+</sup>  
T cells

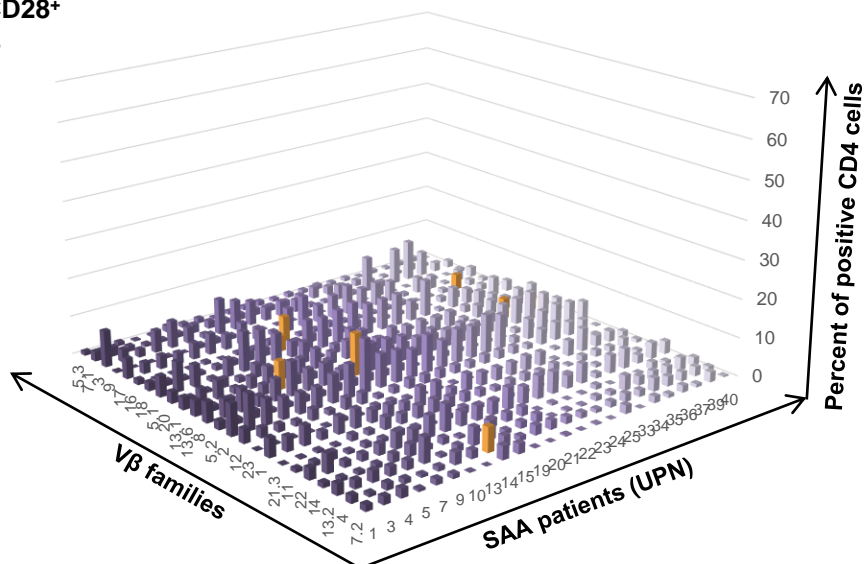

**B** CD4<sup>+</sup>CD57<sup>+</sup>  
T cells

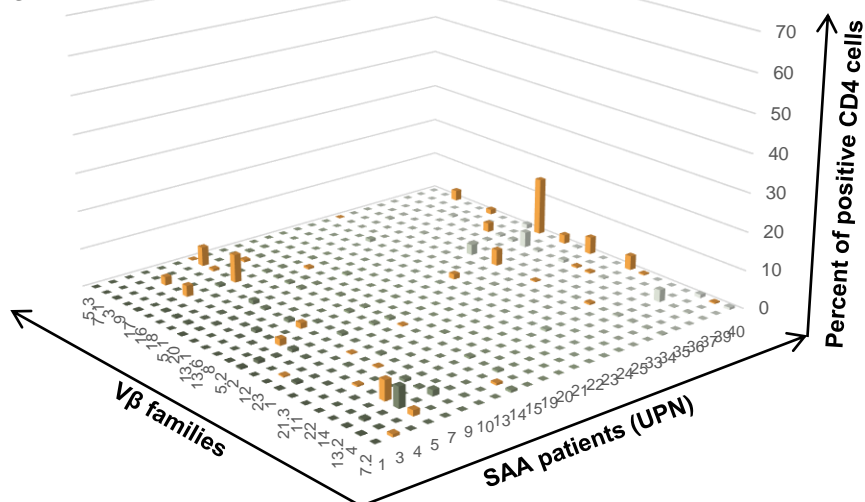

**C** CD8<sup>+</sup>CD28<sup>+</sup>  
T cells

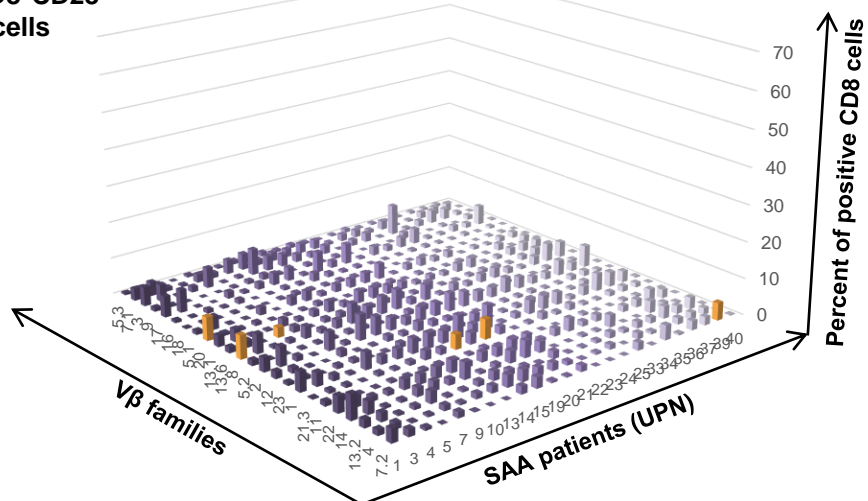

 Frequency > mean + 3SD in healthy controls

**Supplementary Figure S2. Vβ usage of different T cell compartments in SAA patients.**

Vβ usage was studied in CD4<sup>+</sup>CD28<sup>+</sup> (A), CD4<sup>+</sup>CD57<sup>+</sup> (B), and CD8<sup>+</sup>CD28<sup>+</sup> (C) T cells. A bar graph was made for each SAA patient, as described in Figure 2 A.

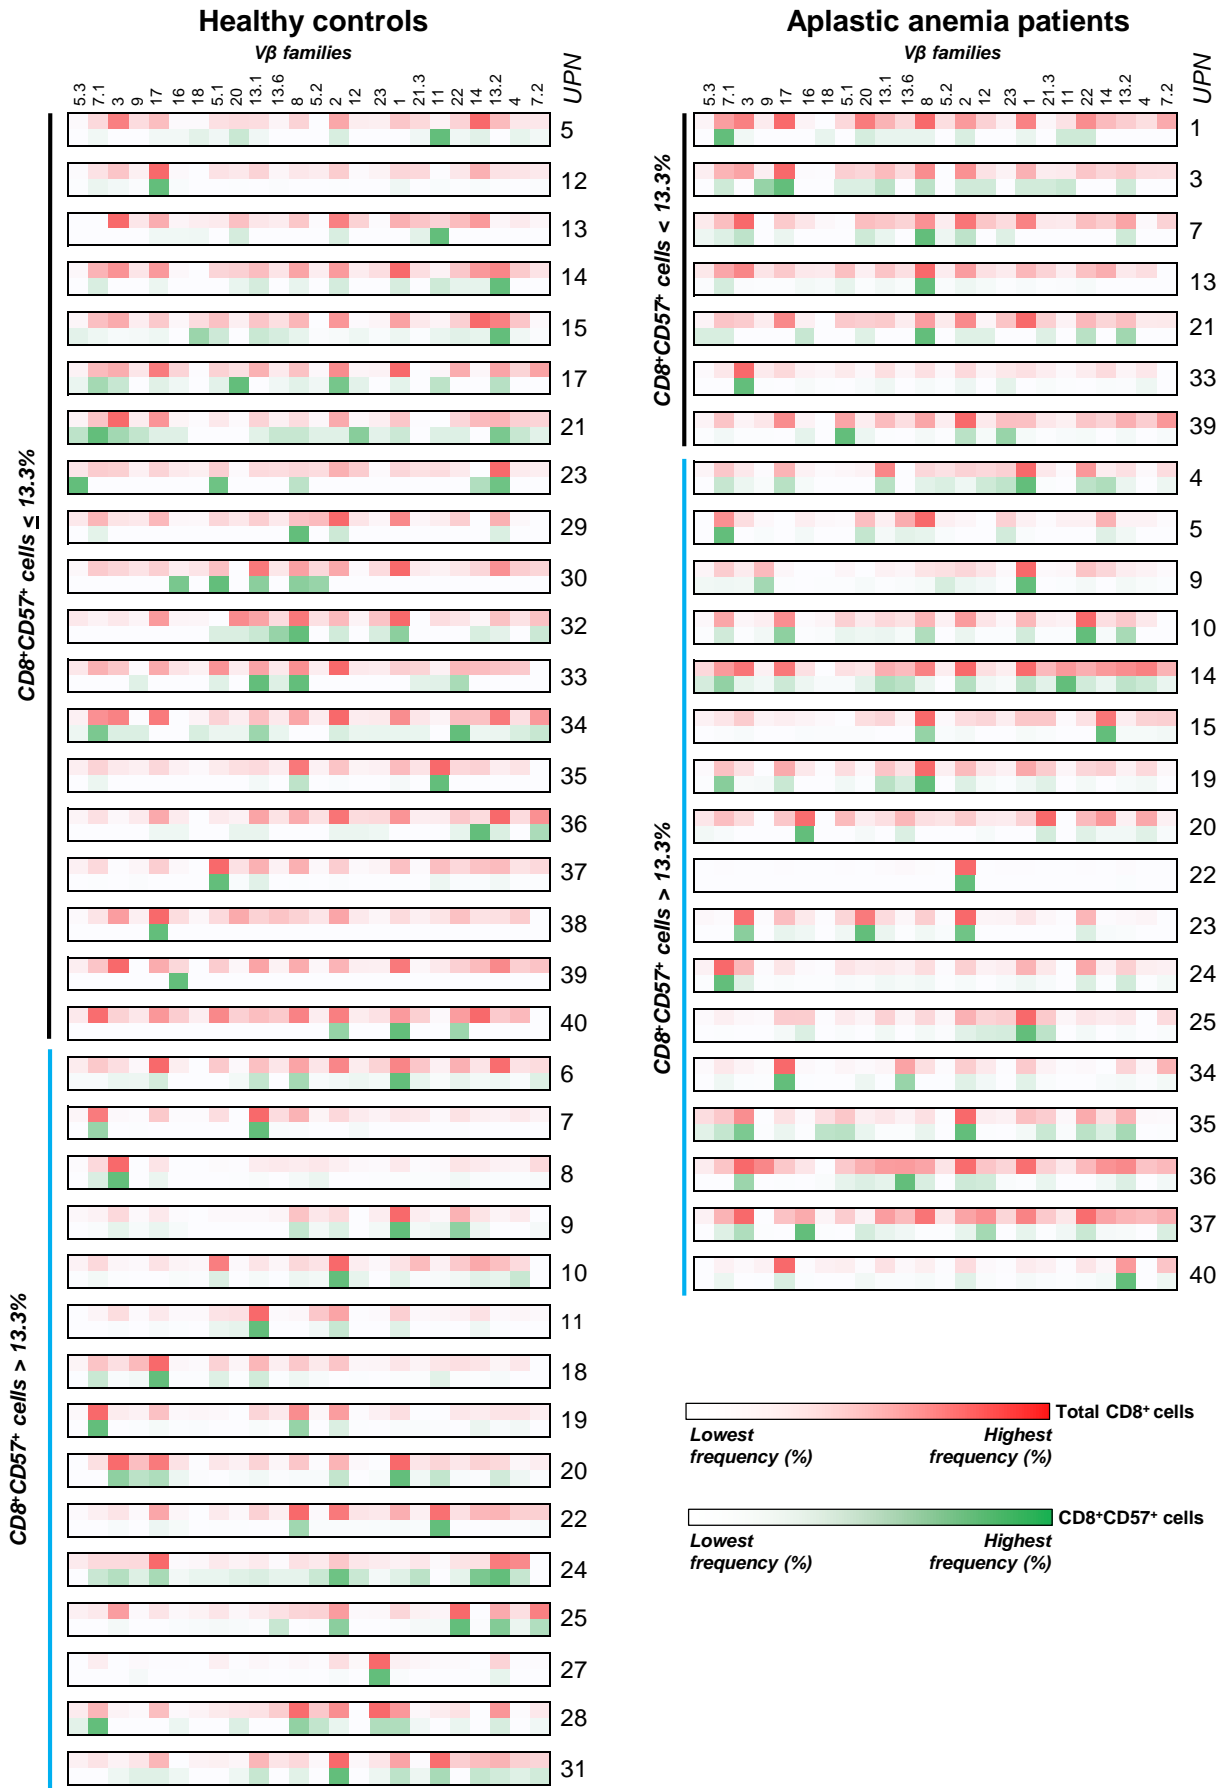



**Supplementary Figure S3. V $\beta$  usage analysis in total CD8<sup>+</sup> and effector memory CD8<sup>+</sup> cells by flow cytometry.**

V $\beta$  usage was studied in CD8<sup>+</sup>CD57<sup>+</sup> and total CD8<sup>+</sup> cells for each healthy donor and SAA patient. Subjects (UPN) were divided using the mean frequency of CD8<sup>+</sup>CD57<sup>+</sup> cells in healthy donors (13.3%) as a cut-off. Results were plotted as relative frequency and converted in color scale. For V $\beta$  usage in effector memory CD8<sup>+</sup> cells (bottom row in each subject), colors range from white to green (from 0% to highest value); while, for total CD8<sup>+</sup> cells (top row in each subject), colors range from white to red (from 0% to highest value).

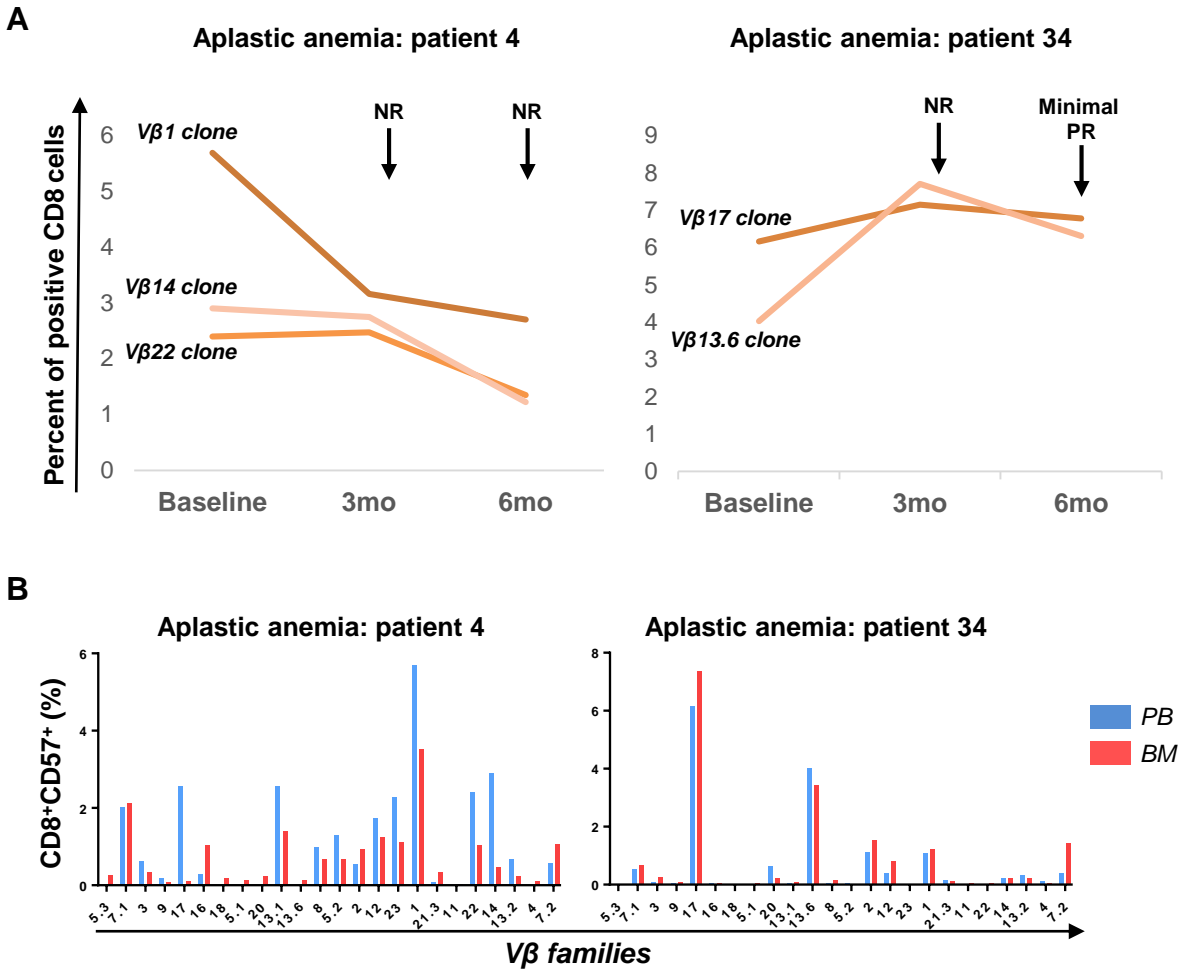

**Supplementary Figure S4. Vβ usage analysis in effector memory CD8<sup>+</sup> cells by flow cytometry during the course of disease and in peripheral blood (PB) and bone marrow (BM).**

(A) Vβ usage was studied in CD8<sup>+</sup>CD57<sup>+</sup> cells from PB of two patients at 3 (3mo) and 6 months (6mo) of immunosuppressive therapies. Both patients were non-responders (NR) at 3 months. At 6 month timepoint, patient 4 was NR, while patient 34 achieved a minimal partial-response (PR). (B) Vβ usage was compared between PB and BM at baseline for these two SAA patients and results shown as bar graphs.

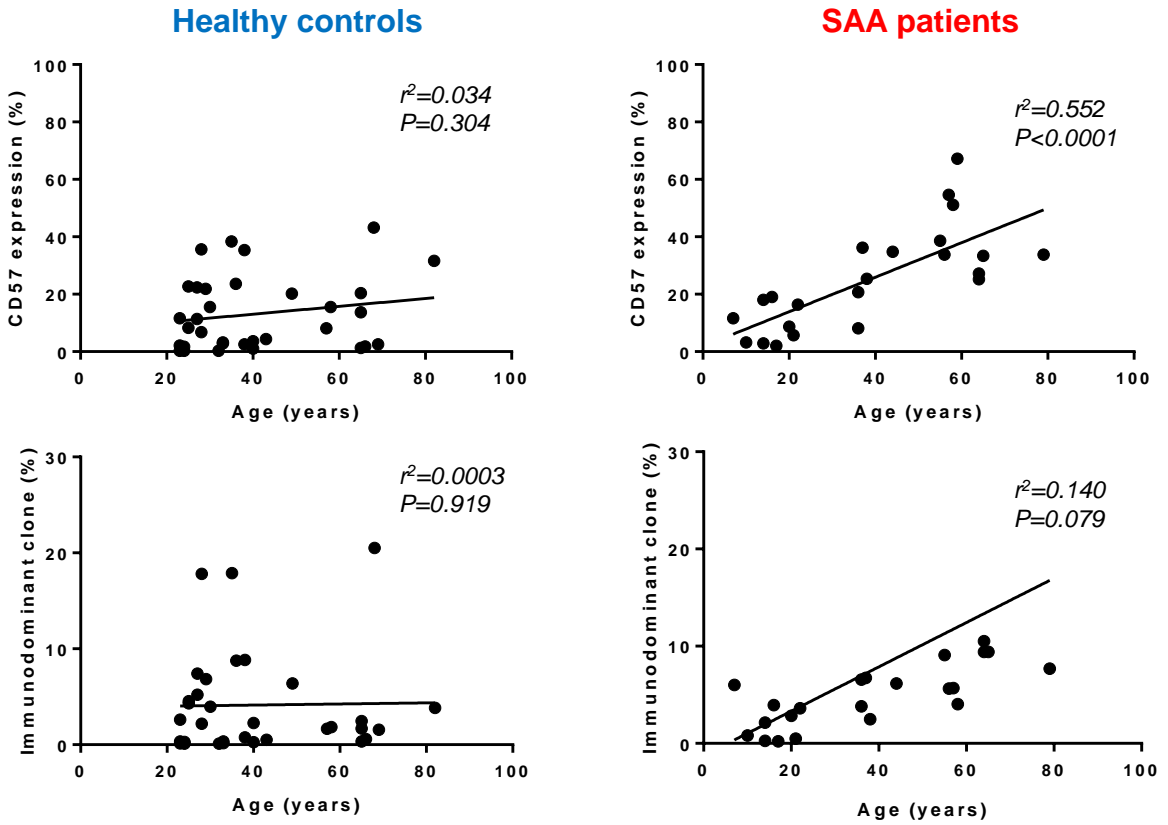

**Supplementary Figure S5. Age-effects assessment on CD57 expression and clone size.**

Linear regression analysis was performed to exclude age-effects on CD57 expression (top) and clone size (bottom). The percentage of the immunodominant clones (bottom panels) were calculated on CD8<sup>+</sup>CD57<sup>+</sup> cells as total CD8<sup>+</sup> cell percentage. R square and p values were reported.  $P < 0.05$  was considered statistically significant.

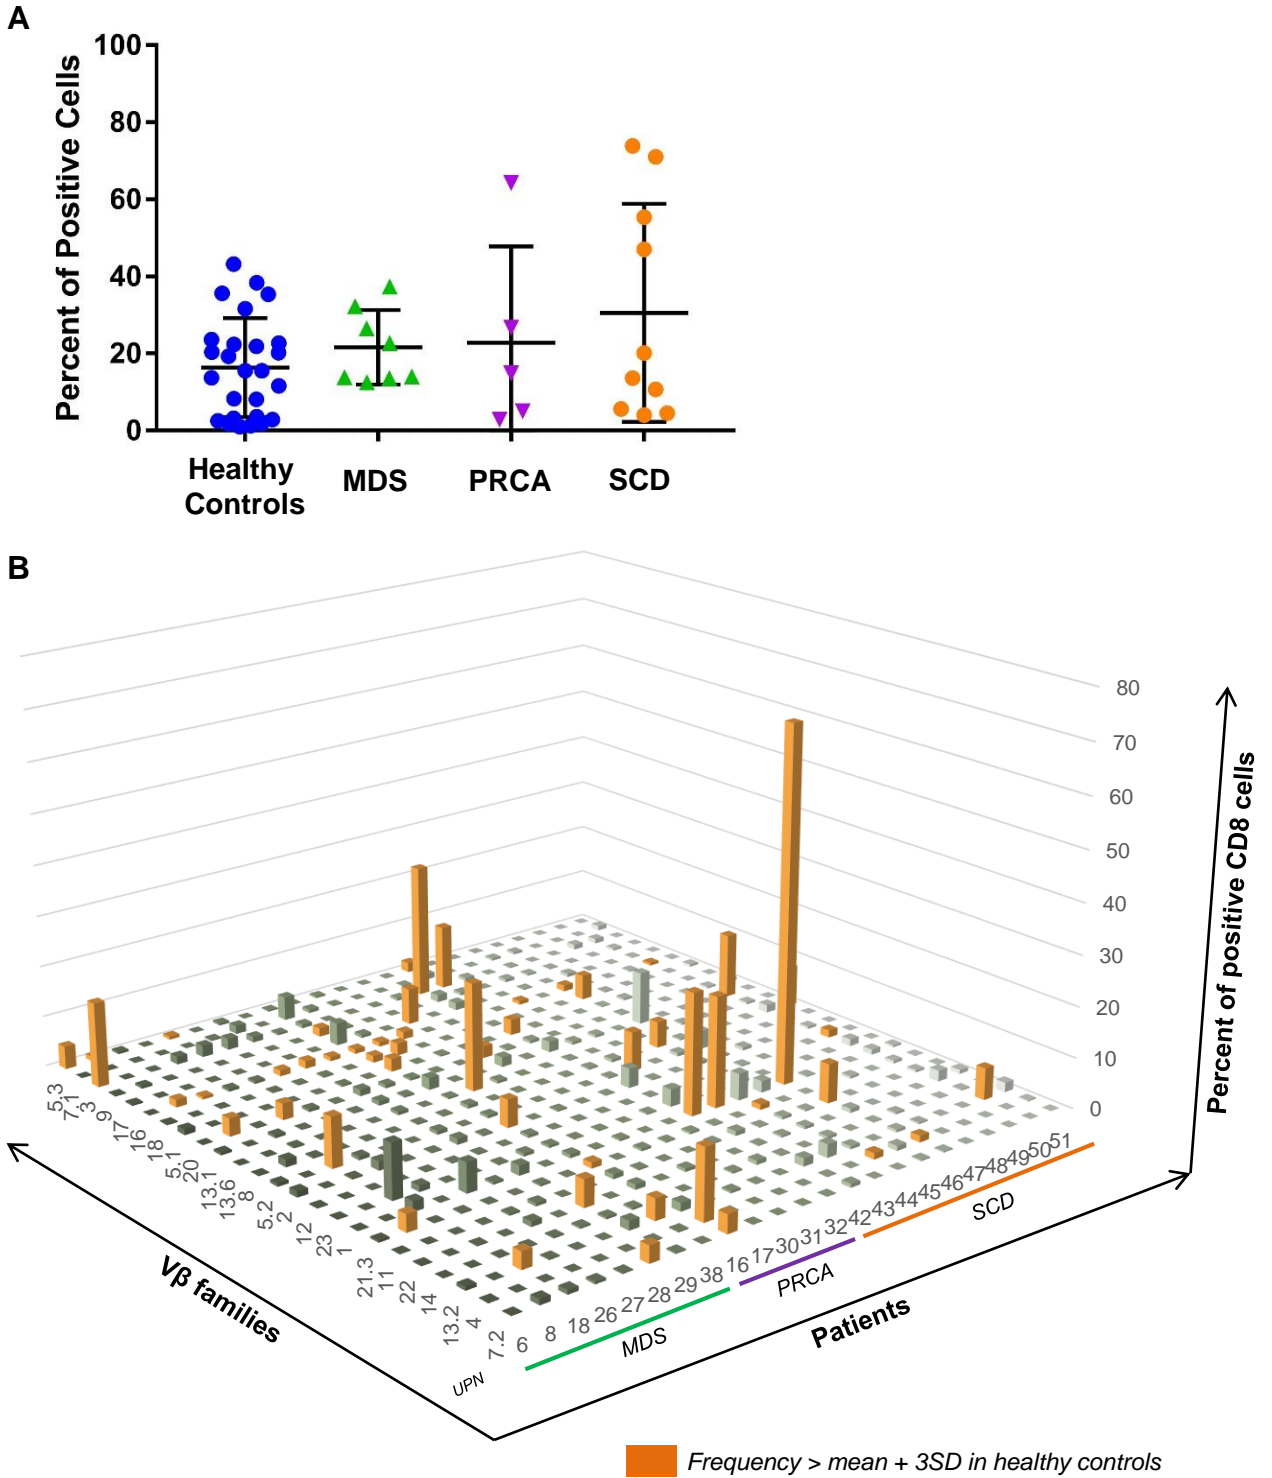

**Supplementary Figure S6. Frequency of CD8<sup>+</sup>CD57<sup>+</sup> cells and Vβ usage analysis in other hematological diseases.**

(A) Percentages of CD8<sup>+</sup>CD57<sup>+</sup> cells were calculated on CD8<sup>+</sup> compartment for healthy controls, myelodysplastic syndrome (MDS), pure red cell aplasia (PRCA) and sickle cell disease (SCD) patients. Data are shown as mean<sub>±</sub>SD. Unpaired t-test was performed and  $P < 0.05$  was considered statistically significant. (B) Percentages of Vβ family in CD8<sup>+</sup>CD57<sup>+</sup> cells were calculated on total CD8<sup>+</sup> cells, and Vβ skewing in patients was defined using the mean+3SD of a given Vβ group in healthy donors. Relative expansion of each Vβ subgroup is shown in the bar graph. Patients were divided based on the disease. The skewing of one Vβ family is reported as orange bar.

A

Total CD4<sup>+</sup> cells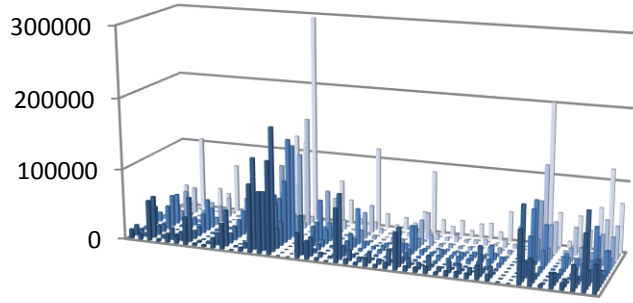

HC4

Total CD8<sup>+</sup> cells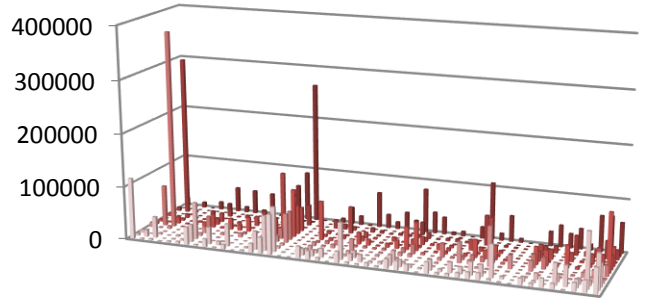

HC5

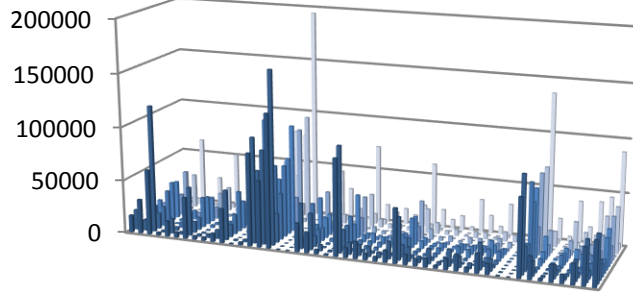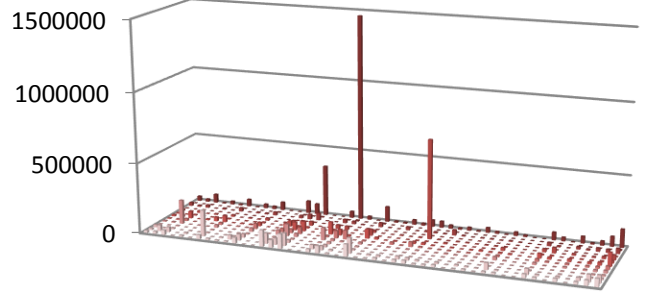

HC6

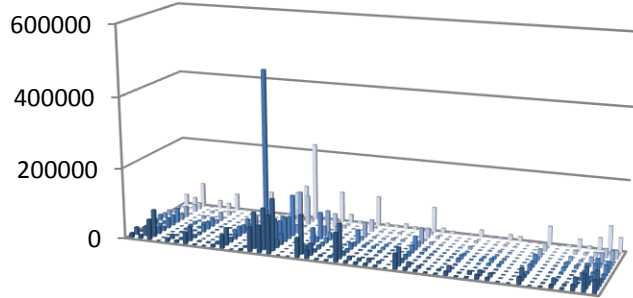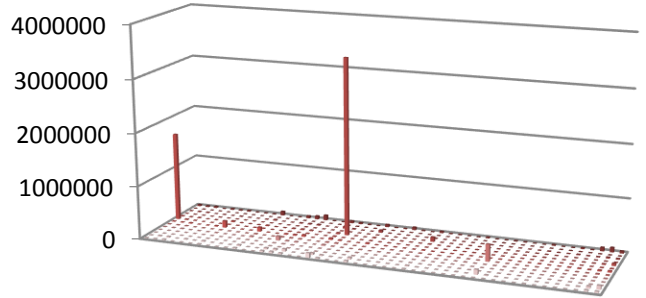

HC7

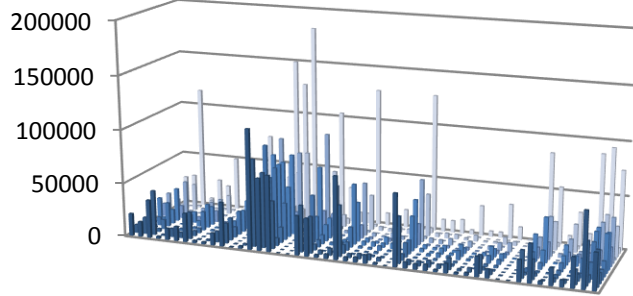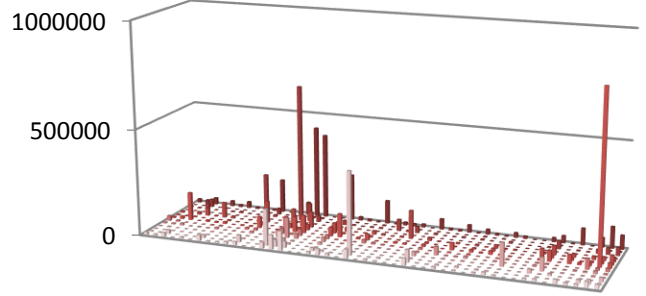

HC8

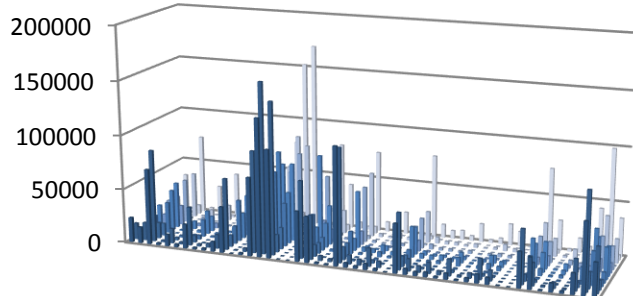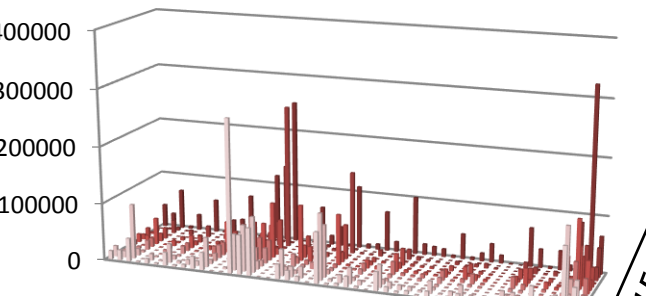

Sequencing Counts as Total Productive Reads

TRBV Families

TRBJ Families

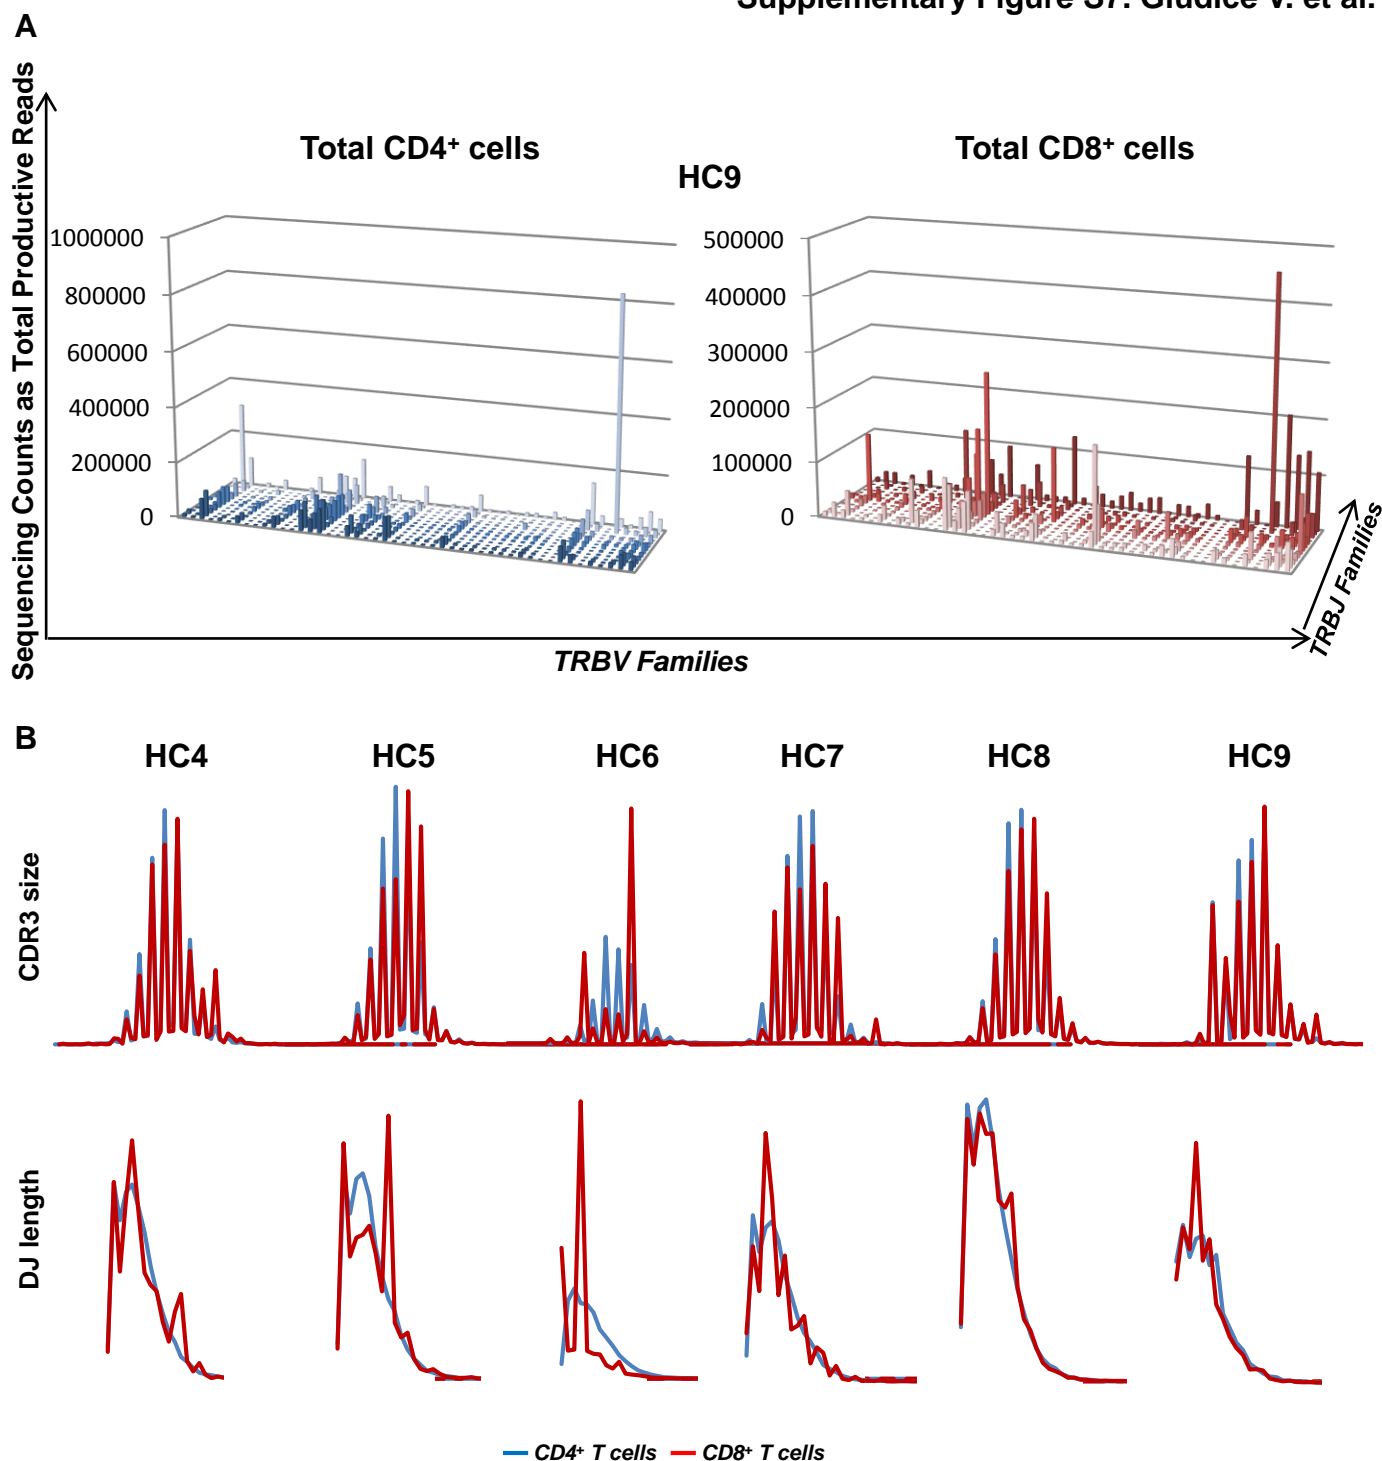

**Supplementary Figure S7. Characterization of V $\beta$ /J $\beta$  plot, CDR3 size and DJ length profiles in healthy donors by deep sequencing.**

(A) T-cell receptor beta variable (TRBV)/T-cell receptor beta joining (TRBJ) plots showed citylike landscape for total CD4<sup>+</sup> and CD8<sup>+</sup> cell populations in healthy subjects (HC). (B) The complementarity region 3 (CDR3) size and DJ length profiles also were defined, showing similar features in CD4<sup>+</sup> and CD8<sup>+</sup> cells.

A

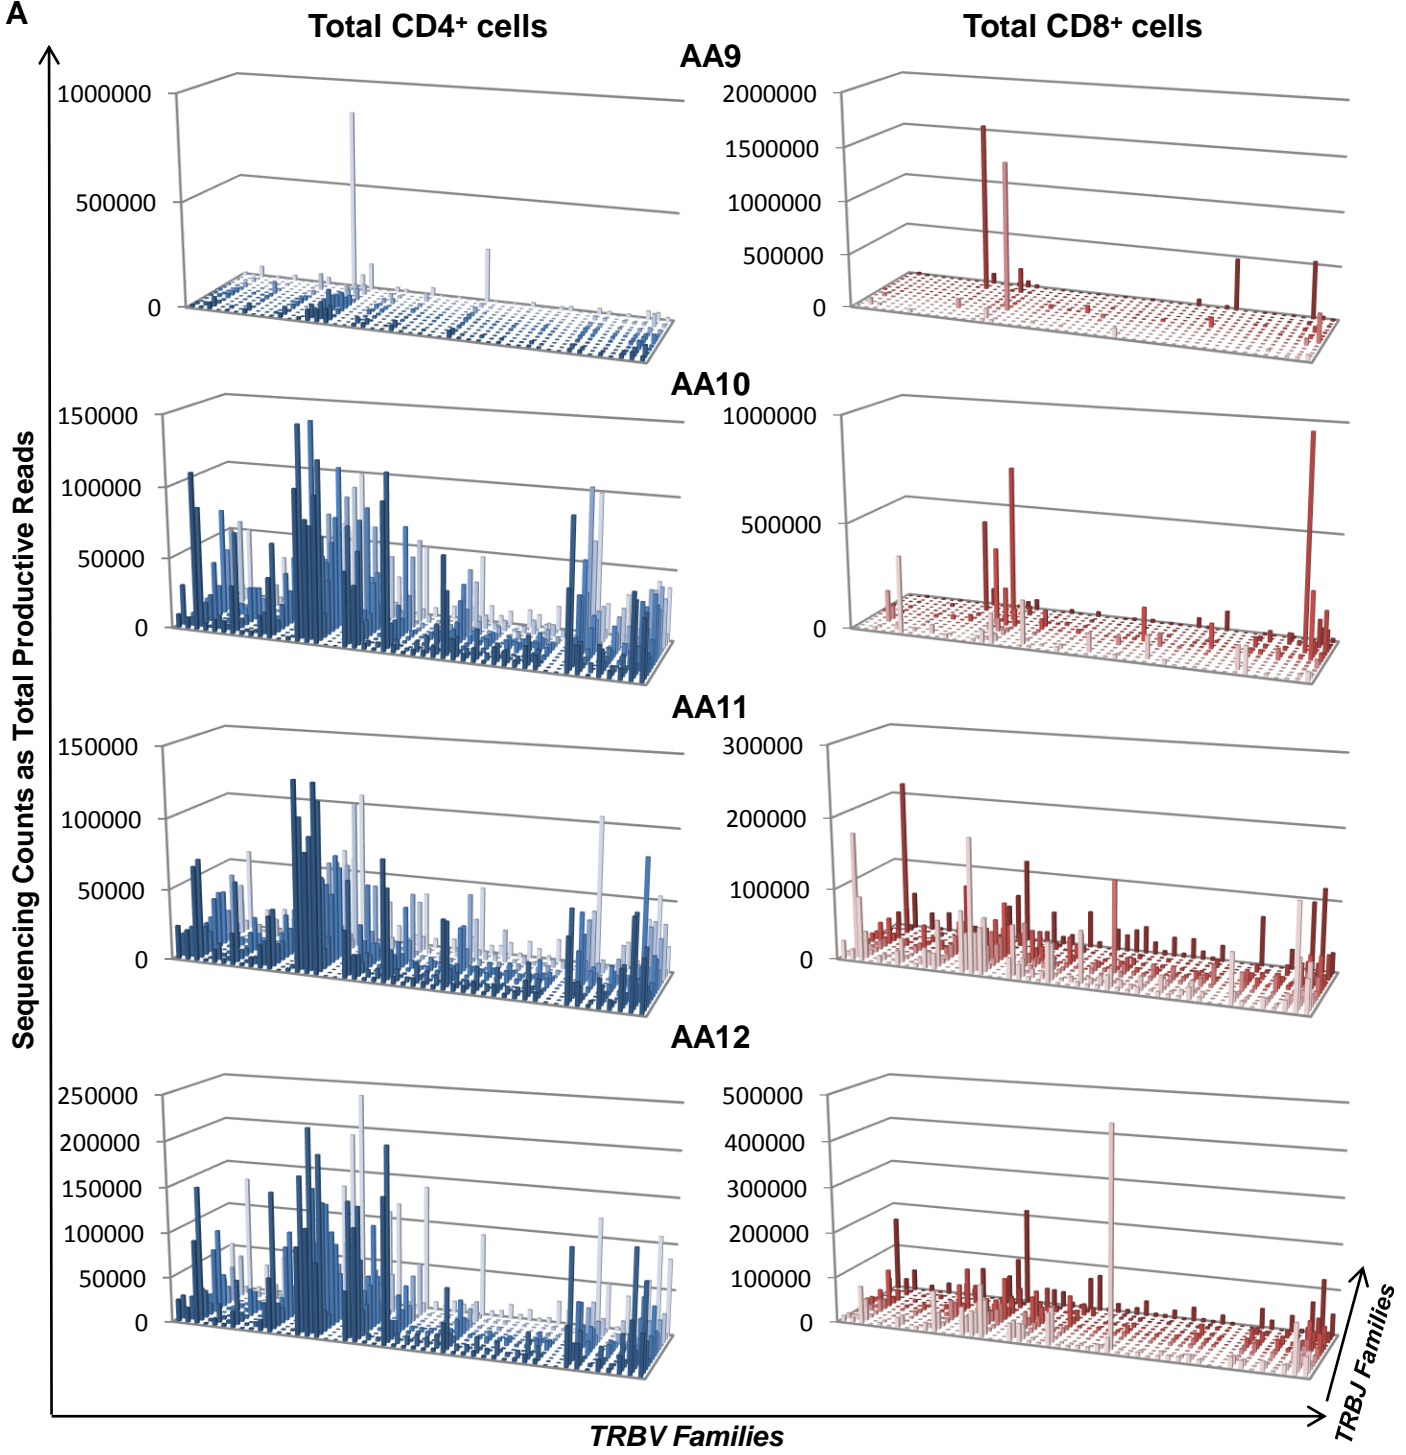

B

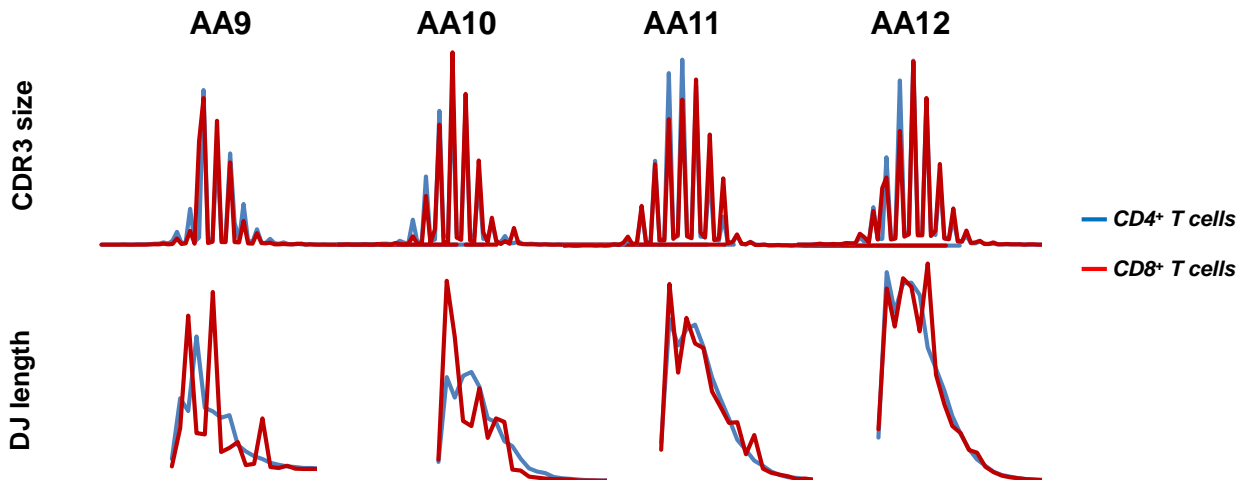

**Supplementary Figure S8. Characterization of V $\beta$ /J $\beta$  plot, CDR3 size and DJ length profiles in severe aplastic anemia patients by deep sequencing.**

(A) T-cell receptor beta variable (TRBV)/T-cell receptor beta joining (TRBJ) plots showed citylike landscape for total CD4<sup>+</sup> cells, and oligoclonality in CD8<sup>+</sup> cell population in aplastic anemia (AA) subjects. (B) The complementarity region 3 (CDR3) size and DJ length profiles also were defined in CD4<sup>+</sup> and CD8<sup>+</sup> cells.



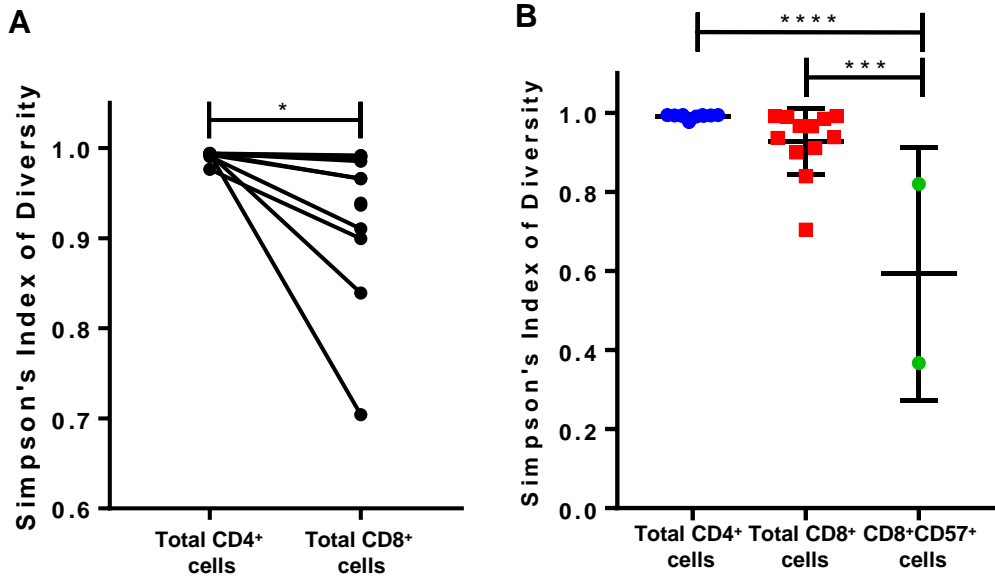

**Supplementary Figure S9. Simpson's index of diversity in aplastic anemia patients.**

(A) By paired t-test, Simpson's indexes were compared between total CD4<sup>+</sup> and total CD8<sup>+</sup> cells for each AA patient. (B) Simpson's indexes were calculated for each patient in total CD4<sup>+</sup>, CD8<sup>+</sup> and CD8<sup>+</sup>CD57<sup>+</sup> cell populations, and compared by one-way ANOVA with Turkey's multiple comparison test. \*,  $P < 0.05$ ; \*\*\*,  $P < 0.001$ ; \*\*\*\*,  $P < 0.0001$ .
