# Supplementary material for: Deep sequencing and flow cytometric characterization of expanded effector memory CD8+CD57+ T cells frequently reveals T-cell receptor Vβ oligoclonality and CDR3 homology in acquired aplastic anemia
Source: PubMed Central journal article supplement — Haematologica. 2018 Feb 1;103(5):759–69. doi: 10.3324/haematol.2017.176701 (PMC5927970; doi:10.3324/haematol.2017.176701), 2018-05
Supplement: 2017_176701-Disclosures_and_Contributions.pdf [file 2017_176701-Disclosures_and_Contributions.pdf]

Haematologica  
HAEMATOL/2017/176701  
Version 4

Deep sequencing and flow cytometric characterization of expanded effector memory CD8+CD57+ T cells frequently reveals T-cell receptor V $\beta$  oligoclonality and CDR3 homology in acquired aplastic anemia

Valentina Giudice, Xingmin Feng, Zenghua Lin, Wei Hu, Fanmao Zhang, Wangmin Qiao, Maria del Pilar Fernandez Ibanez, Olga Rios, and Neal S. Young

Disclosures: The authors declare no competing financial interests.

Contributions: V.G., X.F. and N.S.Y. wrote the manuscript and designed the research; V.G., X.F., Z.L., W.H., F.Z. and W.Q. performed research and analyzed data; M.d.P.F.I. and O.R. collected and analyzed clinical data; and N.S.Y. was the principal investigator.
