# Supplementary material for: Deep sequencing and flow cytometric characterization of expanded effector memory CD8+CD57+ T cells frequently reveals T-cell receptor Vβ oligoclonality and CDR3 homology in acquired aplastic anemia
Source: PubMed Central journal article supplement — Haematologica. 2018 Feb 1;103(5):759–69. doi: 10.3324/haematol.2017.176701 (PMC5927970; doi:10.3324/haematol.2017.176701), 2018-05
Supplement: HAEMATOL-2017-176701v4-Giudice-01.pdf [file HAEMATOL-2017-176701v4-Giudice-01.pdf]

# Analysis of the oligoclonal expansion of effector CD28<sup>+</sup>CD57<sup>+</sup> memory T cells and the TCR V repertoire in aplastic anemia patients by flow cytometry and deep sequencing technologies

## Antigen-driven activation

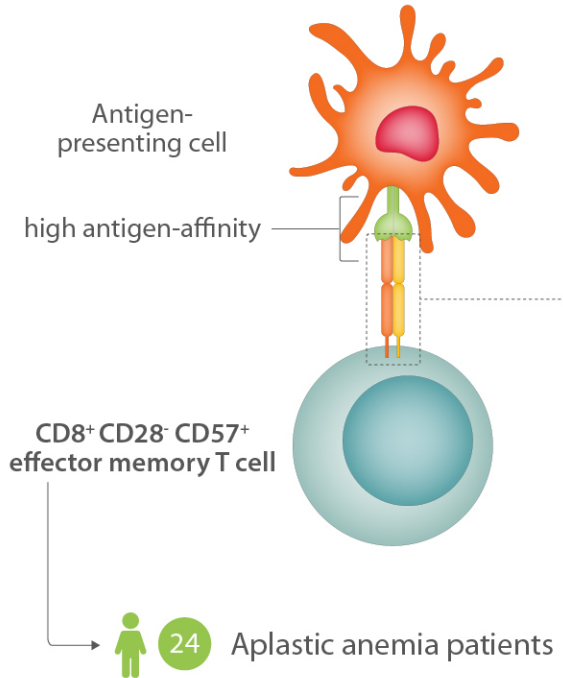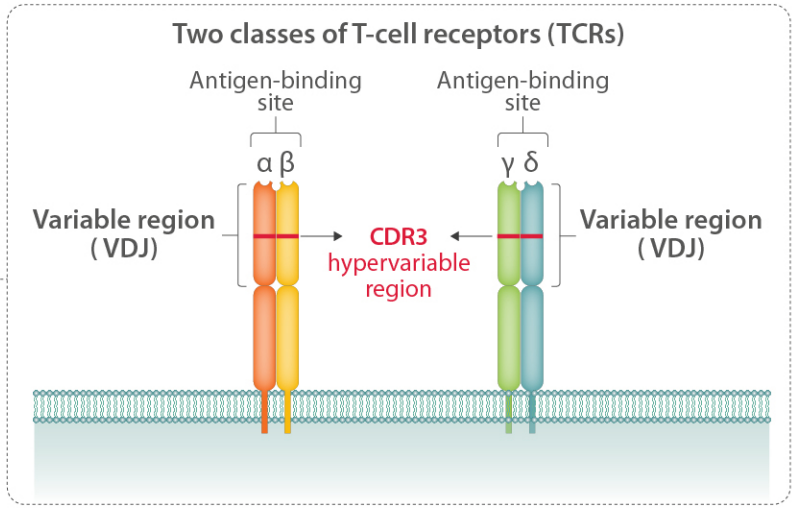

- Deep sequencing technologies of TCR repertoire
- Flow cytometric Vβ usage analysis

- Frequencies of CD8<sup>+</sup> CD57<sup>+</sup> cells
- Frequencies of CD8<sup>+</sup> CD28<sup>+</sup> cells
- Oligoclonal expansion of CD8<sup>+</sup> CD57<sup>+</sup> cells
- Oligoclonal expansion in total CD8<sup>+</sup> cells

|                                                                   | Aplastic anemia | Healthy    |         |
|-------------------------------------------------------------------|-----------------|------------|---------|
| Frequencies of CD8 <sup>+</sup> CD57 <sup>+</sup> cells           | 25.6±17.3%      | 13.3±12.6% | P=0.003 |
| Frequencies of CD8 <sup>+</sup> CD28 <sup>+</sup> cells           | 56.8±25.7%      | 68.8±19.1% | P=0.046 |
| Oligoclonal expansion of CD8 <sup>+</sup> CD57 <sup>+</sup> cells | 92%             |            |         |
| Oligoclonal expansion in total CD8 <sup>+</sup> cells             | 33%             |            |         |
